# Supplementary material for: Biodegradable and biocompatible monodispersed hollow mesoporous organosilica with large pores for delivering biomacromolecules
Source: Royal Society of Chemistry journal article supplement (doi:10.1039/c7tb01526g), 2017-01-01
Supplement: c7tb01526g1.pdf [file c7tb01526g1.pdf]

*Supporting information for*

**Biodegradable and Biocompatible Monodispersed Hollow Mesoporous  
Organosilica with Large Pores for Delivering Biomacromolecules**

Linlin Zhang, Liying Wang, Heliang Yao, Fangfang Xu\* and Yu Chen\*

State Laboratory of High Performance Ceramics and Superfine Microstructure, Shanghai Institute of Ceramics,  
Chinese Academy of Sciences, Shanghai, 200050, P. R. China.

\*E-mail: [ffxu@mail.sic.ac.cn](mailto:ffxu@mail.sic.ac.cn); [chenyu@mail.sic.ac.cn](mailto:chenyu@mail.sic.ac.cn)

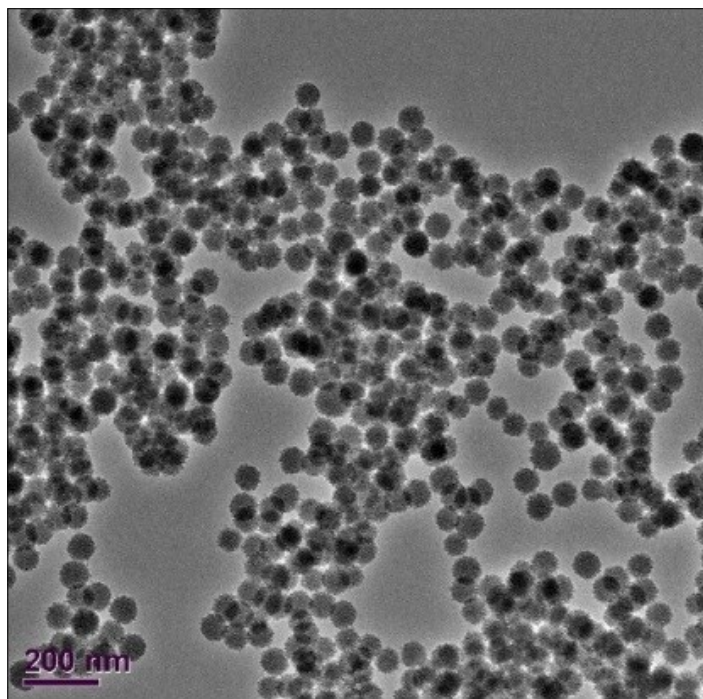

**Figure S1.** TEM image of as-synthesized core/shell-structured MSNs@MONs.

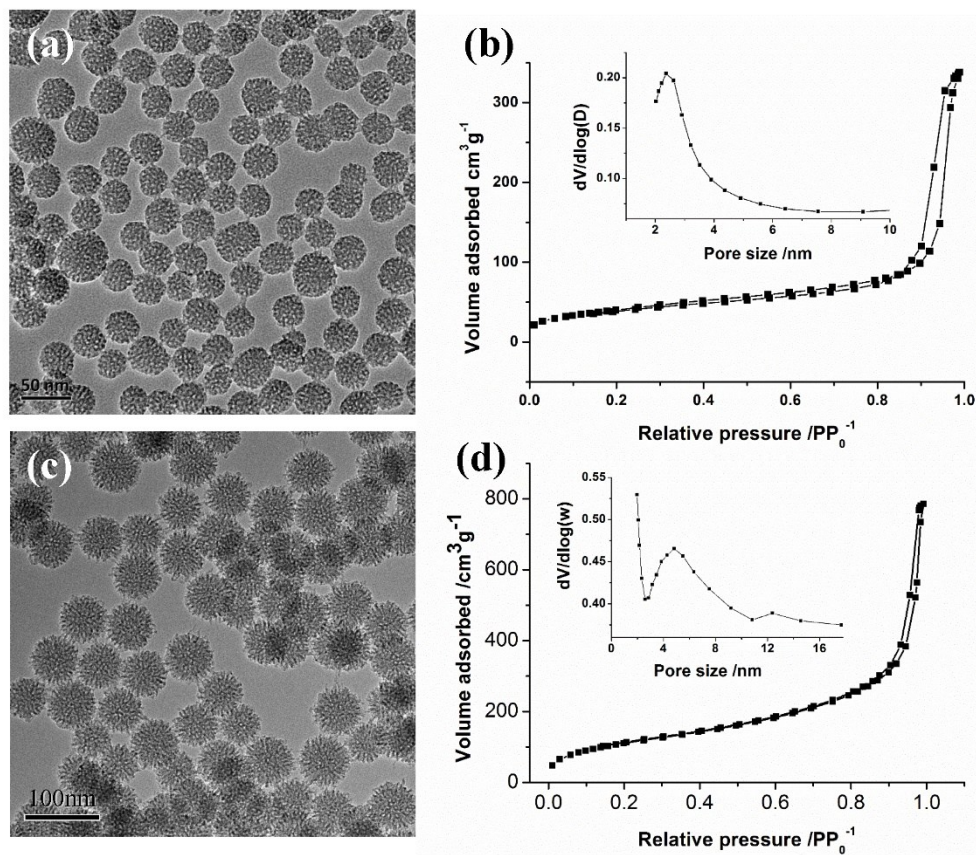

**Figure S2.** (a) TEM image of initially synthesized MSNs. (b)  $N_2$  adsorption-desorption isotherm and corresponding pore-size distribution of MSNs (inset figure). (c) TEM image of MSNs@MONs. (d)  $N_2$  adsorption-desorption isotherm and corresponding pore-size distribution of MSNs@MONs (inset figure).

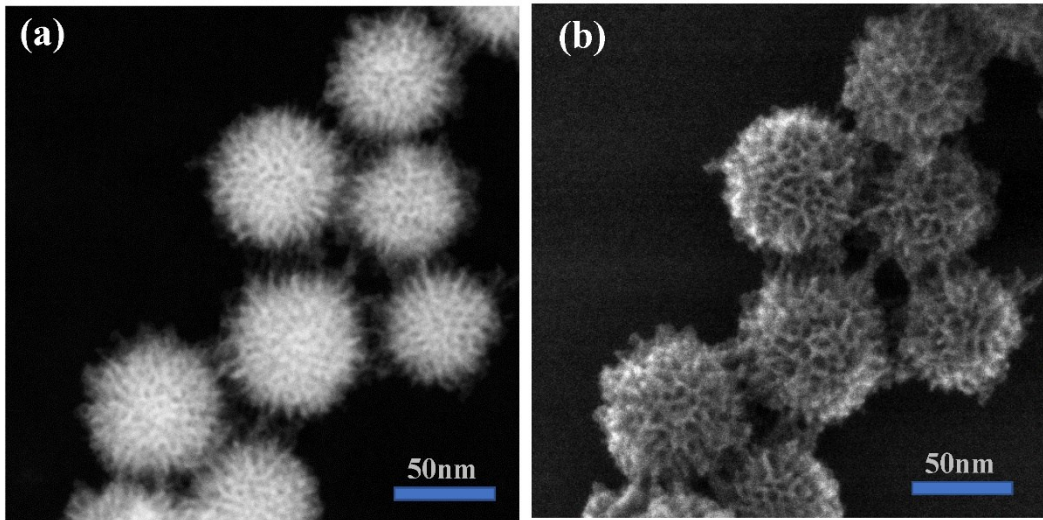

**Figure S3.** (a) Dark-field TEM image and (b) SEM image of core/shell-structured MSNs@MONs.

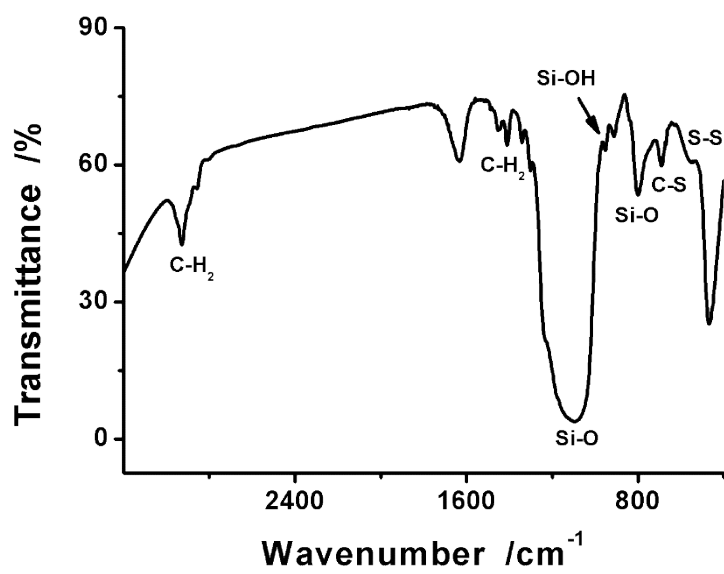

**Figure S4.** FT-IR spectrum of as-synthesized LHMONs.
